# Supplementary material for: Combined Untargeted and Targeted Metabolomics Approaches Reveal Urinary Changes of Amino Acids and Energy Metabolism in Canine Babesiosis With Different Levels of Kidney Function
Source: Front Microbiol. 2021 Sep 17;12:715701. doi: 10.3389/fmicb.2021.715701 (PMC8484968; doi:10.3389/fmicb.2021.715701)
Supplement: Supplementary Table 4 — Pathway analysis of significant metabolites identified by untargeted and targeted MS-based metabolomics approaches. [file Table_4.xlsx]

## Sheet: Worksheet
Supplemental table 4. Pathway analysis of significant metabolites identified by untargeted and targeted MS-based metabolomics approaches.
	Total	Expected	Hits	Raw p	-log10(p)	Holm adjust	FDR	Impact
Aminoacyl-tRNA biosynthesis	48	1.0219	16	3.8205e-17	16.418	3.2092e-15	3.2092e-15	0
Histidine metabolism	16	0.34065	6	3.9974e-07	6.3982	3.3179e-05	1.6789e-05	0.31147
Alanine, aspartate and glutamate metabolism	28	0.59613	6	1.5678e-05	4.8047	0.0012856	0.00043899	0.621
Arginine biosynthesis	14	0.29806	4	0.00014699	3.8327	0.011907	0.0030869	0.19289
Valine, leucine and isoleucine biosynthesis	8	0.17032	3	0.00045843	3.3387	0.036675	0.0077017	0
Phenylalanine, tyrosine and tryptophan biosynthesis	4	0.085161	2	0.002569	2.5902	0.20295	0.035966	1
Glyoxylate and dicarboxylate metabolism	32	0.68129	4	0.0040251	2.3952	0.31396	0.048301	0.13757
Nitrogen metabolism	6	0.12774	2	0.0062527	2.2039	0.48146	0.058358	0
D-Glutamine and D-glutamate metabolism	6	0.12774	2	0.0062527	2.2039	0.48146	0.058358	0.5
Arginine and proline metabolism	38	0.80903	4	0.0075488	2.1221	0.56616	0.06341	0.24551
beta-Alanine metabolism	21	0.4471	3	0.009009	2.0453	0.66667	0.068796	0.05597
Phenylalanine metabolism	10	0.2129	2	0.017783	1.75	1	0.12448	0.35714
Glycine, serine and threonine metabolism	33	0.70258	3	0.031067	1.5077	1	0.20074	0.24577
Butanoate metabolism	15	0.31935	2	0.038829	1.4108	1	0.23297	0.03175
Pantothenate and CoA biosynthesis	19	0.40452	2	0.059985	1.222	1	0.33592	0
Glutathione metabolism	28	0.59613	2	0.11788	0.92856	1	0.61887	0.10839
Porphyrin and chlorophyll metabolism	30	0.63871	2	0.13218	0.87883	1	0.65313	0
Purine metabolism	65	1.3839	3	0.15764	0.80233	1	0.66565	0.02179
Ascorbate and aldarate metabolism	8	0.17032	1	0.15849	0.8	1	0.66565	0
Taurine and hypotaurine metabolism	8	0.17032	1	0.15849	0.8	1	0.66565	0
Ubiquinone and other terpenoid-quinone biosynthesis	9	0.19161	1	0.1765	0.75326	1	0.6739	0
Vitamin B6 metabolism	9	0.19161	1	0.1765	0.75326	1	0.6739	0.4902
Biotin metabolism	10	0.2129	1	0.19413	0.7119	1	0.70901	0
Valine, leucine and isoleucine degradation	40	0.85161	2	0.20843	0.68105	1	0.72949	0
Primary bile acid biosynthesis	46	0.97935	2	0.25629	0.59127	1	0.86112	0.01563
Nicotinate and nicotinamide metabolism	15	0.31935	1	0.27696	0.55759	1	0.89478	0
Selenocompound metabolism	20	0.42581	1	0.3515	0.45407	1	1	0
Citrate cycle (TCA cycle)	20	0.42581	1	0.3515	0.45407	1	1	0.09038
Lysine degradation	25	0.53226	1	0.41857	0.37823	1	1	0
Cysteine and methionine metabolism	33	0.70258	1	0.51212	0.29063	1	1	0.10446
Glycerophospholipid metabolism	36	0.76645	1	0.54329	0.26497	1	1	0.02582
Amino sugar and nucleotide sugar metabolism	37	0.78774	1	0.55325	0.25708	1	1	0.02186
Pyrimidine metabolism	39	0.83032	1	0.57253	0.2422	1	1	0
Tryptophan metabolism	41	0.8729	1	0.591	0.22841	1	1	0.14305
Tyrosine metabolism	42	0.89419	1	0.59995	0.22189	1	1	0.13972
Fatty acid biosynthesis	47	1.0006	1	0.6419	0.19253	1	1	0
